# Supplementary material for: The Antidiabetic Drug Metformin Regulates Voltage-Gated Sodium Channel NaV1.7 via the Ubiquitin-Ligase NEDD4-2
Source: eNeuro. 2022 Mar 3;9(2):ENEURO.0409-21.2022. doi: 10.1523/ENEURO.0409-21.2022 (PMC8906783; doi:10.1523/ENEURO.0409-21.2022)
Supplement: Table 1-1 — Supplemental data table of reagents, solutions, and RRID references, supporting all of the figures. RRID and source references of the resources used in the current study are noted. Download Table 1-1, XLSX file. [file enu-eN-NWR-0409-21-s08.xlsx]

## Sheet: Feuil1
Extended Data Table 1: Products references RRID
Reagent or resource	Source (Company, City, State, Country)	Catalogue Number	RRID (Resource Identification Portal)/MGI (Mouse Genome Informatics)
Mice
Mouse line Nedd4Lflox	Baoli Yang (gift from O. Staub)	Nedd4ltm1.1Blyg	MGI Cat# 3846430, RRID:MGI:3846430
Mouse line SNS-Cre	Rohini Kuner	Tg(Scn10a-cre)1Rkun	MGI Cat# 3042874, RRID:MGI:3042874
Antibodies
Goat Anti-Mouse Immunoglobulins/HRP antibody	Agilent Technologies, Santa Clara, Californie (CA), USA	#P0447	Agilent Cat# P0447, RRID:AB_2617137
Goat Anti-Rabbit Immunoglobulins/HRP antibody	Agilent Technologies, Santa Clara, Californie (CA), USA	#P0448	Agilent Cat# P0448, RRID:AB_2617138
Mouse Anti-alpha-Tubulin Antibody	Sigma-Aldrich Inc., Saint-Louis, Missouri (MO), USA	#T5168	Sigma-Aldrich Cat# T5168, RRID:AB_477579
Mouse Anti-NaV.7 Antibody Clone N68/6	UC Davis/National Institute of Health (NIH) NeuroMab Facility	#N68/6	Antibodies Incorporated Cat# 75-103, RRID:AB_2184355
Rabbit Anti-AMPK-alpha Antibody, Unconjugated	Cell Signaling Technology, Danvers, Massachusetts (MA), USA	#2532	Cell Signaling Technology Cat# 2532, RRID:AB_330331
Rabbit Anti-NEDD4-2 Antibody	Abcam, Cambridge, UK	#ab46521	Abcam Cat# ab46521, RRID:AB_2149325
Rabbit Anti-Phospho-AMPK (Thr172) Antibody	Cell Signaling Technology, Danvers, Massachusetts (MA), USA	#2531	Cell Signaling Technology Cat# 2531, RRID:AB_330330
Rabbit Anti-Phospho-NEDD4-2 (S328) Antibody	kindly provided by O. Staub, University of Lausanne, Switzerland
Plasmids
pIRES2-AcGFP1	Takara Bio Inc., Shiga, Japan	Cat#632435
Plasmid empty vector	pIRES-CD8; kindly provided by H. Abriel, University of Bern, Switzerland
Plasmid Nav1.7	pCIN5hNav1.7; kindly provided by S. Tate, Convergence Pharmaceuticals, Biogen International GmbH, Baar, Switzerland
Plasmid NEDD4-2	pCDNA3.1(-)-hNedd4-2(b); kindly provided by T. Nagase, Kazusa DNA Research Institute, Kisarazu, Japan
Plasmid NEDD4-2-CS	pCDNA3.1(-)-hNedd4-2(a)-CS
Cell line
Human Embryonic Kidney 293 cells (HEK293)	The European Collection of Authenticated Cell Cultures (ECACC)	ECACC Cat# 12022001	RRID:CVCL_0063
Material/Equipment
Borosilicate Pipettes	Sutter instrument, Novato, California (CA), USA	#BF150-86-7.5
Centrifuge 5417R	Eppendorf, Hamburg, Germany	#5417R
Coverslips 12 mm	VWR, Radnor, Pennsylvania (PA), USA	#631-1577
EPC-9 amplifier	HEKA Electronik GmbH, Lambrecht, Germany
Falcon® 25cm² Rectangular Canted Neck Cell Culture Flask with Vented Cap	Corning Inc., Corning, New-York (NY), USA	#353108
Falcon® 6-well Clear Flat Bottom TC-treated Multiwell Cell Culture Plate	Corning Inc., Corning, New-York (NY), USA	#353224
Falcon® P100 cell culture dishes	Corning Inc., Corning, New-York (NY), USA	#353003
Multiclamp Axon Amplifier 700B	Molecular Devices, San Jose, California (CA), USA	#700B
PVDF membrane	BioRad, Hercules, California (CA), USA	#162-0177
QuikChange Site-Directed Mutagenesis Kit	Agilent Technologies, Stratagene, Santa Clara, Californie (CA), USA	#200519
Software
Fiji (ImageJ Software)	Schindelin et al., 2012		Fiji, RRID:SCR_002285
GraphPad Prism 7 Software	GraphPad Software Inc., San Diego, California (CA), USA		GraphPad Prism, RRID:SCR_002798
KaleidaGraph 4.03 Software	Synergy Software Inc., Reading, Pennsylvania (PA), USA		KaleidaGraph, RRID:SCR_014980
LAS4000 Fuji system (ImageQuant LAS 4000)	GE Healthcare, Chicago, Illinois (IL), USA		ImageQuant, RRID:SCR_014246
Patchmaster Software	HEKA Electronik GmbH, Lambrecht, Germany		Patchmaster, RRID:SCR_000034
pClamp 10 Software	Molecular Devices, San Jose, California (CA), USA		pClamp, RRID:SCR_011323
Reagents
Acrylamide/Bis-acrylamide	SERVA Electrophoresis GmbH,Heidelberg, Germany	#10681
Aspartic acid	Sigma-Aldrich Inc., Saint-Louis, Missouri (MO), USA	#A9256
Bovine Serum Albumin (BSA)	Sigma-Aldrich Inc., Saint-Louis, Missouri (MO), USA	#A9647
Bromophenol blue	BioRad, Hercules, California (CA), USA	#161-0404
CaCl2 (Calcium chloride dihydrate)	Merck Millipore, Burlington, Massachusetts (MA), USA	#102382
Cd-Cl2 (Cadmium chloride hydrate)	Sigma-Aldrich Inc., Saint-Louis, Missouri (MO), USA	#529575
Choline-Cl	Sigma-Aldrich Inc., Saint-Louis, Missouri (MO), USA	#C1879
Complete protease inhibitor cocktail	Roche, Basel, Switzerland	#11697498001
CsCl (Cesium Chloride)	Sigma-Aldrich Inc., Saint-Louis, Missouri (MO), USA	#289329
CsF (Cesium fluoride)	Sigma-Aldrich Inc., Saint-Louis, Missouri (MO), USA	#289345
Cs-OH (Cesium hydroxide monohydrate)	Sigma-Aldrich Inc., Saint-Louis, Missouri (MO), USA	#516988
DMEM/F12	Thermo Fisher Scientific Inc., Waltham, Massachusetts (MA), USA	#21331-020
DTT (dithiothréitol)	AppliChem, Darmstadt, Germany	#A1101
Dulbecco's Modified Eagle's Medium (DMEM)	Thermo Fisher Scientific Inc., Waltham, Massachusetts (MA), USA	#21885-025
EDTA (Ethylene Diamine Tetra Acetic Acid)	Sigma-Aldrich Inc., Saint-Louis, Missouri (MO), USA	#E5134
EGTA (Ethylene Glycol Tetra Acetic Acid)	Sigma-Aldrich Inc., Saint-Louis, Missouri (MO), USA	#E4378
EZ-link Sulfo-NHS-SS-Biotin	Thermo Fisher Scientific Inc., Waltham, Massachusetts (MA), USA	#21331
Fetal Bovine Serum (FBS)	Thermo Fisher Scientific Inc., Waltham, Massachusetts (MA), USA	#10082
Glucose D-(+)	Sigma-Aldrich Inc., Saint-Louis, Missouri (MO), USA	#G7021
Glycerol (Calbiochem)	Merck Millipore, Burlington, Massachusetts (MA), USA	#356352
Glycine	AppliChem, Darmstadt, Germany	#A1067
HEPES	AppliChem, Darmstadt, Germany	#A1069
JetPEI	Polyplus transfection, New-York, New-York (NY), USA	#101-10N
KCl (Potassium Chloride)	Sigma-Aldrich Inc., Saint-Louis, Missouri (MO), USA	#P9333
Liberase blendzyme TH	Roche, Basel, Switzerland	#5401151001
Liberase blendzyme TM	Roche, Basel, Switzerland	#5401127001
Metformin-HCl	LKT Laboratories Inc.,St Paul, Minnesota (MN), USA	#LKT-M2076-G025
MgCl2-6H2O (Magnesium chloride hexahydrate)	Merck Millipore, Burlington, Massachusetts (MA), USA	#105832
Na2-ATP (Adenosine 5′-triphosphate disodium salt hydrate)	Sigma-Aldrich Inc., Saint-Louis, Missouri (MO), USA	#A2383
NaCl (Sodium Chloride)	Sigma-Aldrich Inc., Saint-Louis, Missouri (MO), USA	#S9625
NaCl 150 mM	Polyplus transfection, New-York, New-York (NY), USA	#702-50
NaOH (Sodium hydroxide)	Sigma-Aldrich Inc., Saint-Louis, Missouri (MO), USA	#S8045
NEM (N-Ethylmaleimide)	Sigma-Aldrich Inc., Saint-Louis, Missouri (MO), USA	#E3876
Papain	Sigma-Aldrich Inc., Saint-Louis, Missouri (MO), USA	#P3125
Penicillin/Streptomycin (P/S)	Sigma-Aldrich Inc., Saint-Louis, Missouri (MO), USA	#P0781
PhenylMethaneSulfonylFluoride (PMSF)	Sigma-Aldrich Inc., Saint-Louis, Missouri (MO), USA	#P7626
Phosphatase inhibitor cocktail (PhosSTOP EASYpack)	Roche, Basel, Switzerland	#04906837001
Phosphate buffered saline (PBS) pH7.4	Thermo Fisher Scientific Inc., Waltham, Massachusetts (MA), USA	#10010
Poly-D-Lysine	Sigma-Aldrich Inc., Saint-Louis, Missouri (MO), USA	#P7886
Protein Assay Dye reagent (Bradford test-based)	BioRad, Hercules, California (CA), USA	#500-0006
Protoxin II (ProTxII)	Kindly provided by B. Priest (Merck Serono)	#P0033
SDS (Sodium Dodecyl Sulfate)	Sigma-Aldrich Inc., Saint-Louis, Missouri (MO), USA	#L4390
Sorbitol	Sigma-Aldrich Inc., Saint-Louis, Missouri (MO), USA	#S1876
Strepatvidin Sepharose High Performance Beads	GE Healthcare, Chicago, Illinois (IL), USA?	#17-5113-01
Sucrose (D+ Saccharose)	AppliChem, Darmstadt, Germany	#A2211
SuperSignal West Dura Extended Duration Substrate	Thermo Fisher Scientific Inc., Waltham, Massachusetts (MA), USA	#34075
TEA-Cl (Tetraethylammonium chloride)	Sigma-Aldrich Inc., Saint-Louis, Missouri (MO), USA	#T2265
Tris	AppliChem, Darmstadt, Germany	#A1086
Triton X-100	Sigma-Aldrich Inc., Saint-Louis, Missouri (MO), USA	#T9284
Trypsin Inhibitor	Sigma-Aldrich Inc., Saint-Louis, Missouri (MO), USA	#T6522

## Sheet: soft
Fiji (ImageJ Software)			Fiji, RRID:SCR_002285
GraphPad Prism 7 Software	GraphPad Software Inc., San Diego, California (CA), USA		GraphPad Prism, RRID:SCR_002798
KaleidaGraph 4.03 Software	Synergy Software Inc., Reading, Pennsylvania (PA), USA		KaleidaGraph, RRID:SCR_014980
Patchmaster Software	HEKA Electronik GmbH, Lambrecht, Germany		Patchmaster, RRID:SCR_000034
pClamp 10 Software	Molecular Devices, San Jose, California (CA), USA		pClamp, RRID:SCR_011323

## Sheet: equip
Borosilicate Pipettes	Sutter instrument, Novato, California (CA), USA	#BF150-86-7.5
Centrifuge 5417R	Eppendorf, Hamburg, Germany	#5417R
Coverslips 12 mm	VWR, Radnor, Pennsylvania (PA), USA	#631-1577
EPC-9 amplifier	HEKA Electronik GmbH, Lambrecht, Germany
Falcon® 25cm² Rectangular Canted Neck Cell Culture Flask with Vented Cap	Corning Inc., Corning, New-York (NY), USA	#353108
Falcon® 6-well Clear Flat Bottom TC-treated Multiwell Cell Culture Plate	Corning Inc., Corning, New-York (NY), USA	#353224
Falcon® P100 cell culture dishes	Corning Inc., Corning, New-York (NY), USA	#353003
LAS4000 Fuji system (ImageQuant LAS 4000)	GE Healthcare, Chicago, Illinois (IL), USA		ImageQuant, RRID:SCR_014246
Multiclamp Axon amplifier 700B	Molecular Devices, San Jose, California (CA), USA
PVDF membrane	BioRad, Hercules, California (CA), USA	#162-0177
QuikChange Site-Directed Mutagenesis Kit	Agilent Technologies, Stratagene, Santa Clara, Californie (CA), USA	#200519

## Sheet: plasmid
pIRES2-AcGFP1	Takara Bio Inc., Shiga, Japan	Cat#632435
Plasmid empty vector	kindly provided by H. Abriel, University of Bern, Switzerland		pIRES-CD8
Plasmid Nav1.7	kindly provided by S. Tate, Convergence Pharmaceuticals, Biogen International GmbH, Baar, Switzerland		pCIN5hNav1.7
Plasmid NEDD4-2	kindly provided by T. Nagase, Kazusa DNA Research Institute, Kisarazu, Japan		pCDNA3.1(-)-hNedd4-2(b)
Plasmid NEDD4-2-CS			pCDNA3.1(-)-hNedd4-2(a)-CS

## Sheet: AB
Goat Anti-Mouse Immunoglobulins/HRP antibody	Agilent Technologies, Santa Clara, Californie (CA), USA	#P0447	Agilent Cat# P0447, RRID:AB_2617137
Goat Anti-Rabbit Immunoglobulins/HRP antibody	Agilent Technologies, Santa Clara, Californie (CA), USA	#P0448	Agilent Cat# P0448, RRID:AB_2617138
Mouse Anti-alpha-Tubulin Antibody	Sigma-Aldrich Inc., Saint-Louis, Missouri (MO), USA	#T5168	Sigma-Aldrich Cat# T5168, RRID:AB_477579
Mouse Anti-NaV.7 Antibody Clone N68/6	UC Davis/National Institute of Health (NIH) NeuroMab Facility	#N68/6	Antibodies Incorporated Cat# 75-103, RRID:AB_2184355
Rabbit Anti-AMPK-alpha Antibody, Unconjugated	Cell Signaling Technology, Danvers, Massachusetts (MA), USA	#2532	Cell Signaling Technology Cat# 2532, RRID:AB_330331
Rabbit Anti-NEDD4-2 Antibody	Abcam, Cambridge, UK	#ab46521	Abcam Cat# ab46521, RRID:AB_2149325
Rabbit Anti-Phospho-AMPK (Thr172) Antibody	Cell Signaling Technology, Danvers, Massachusetts (MA), USA	#2531	Cell Signaling Technology Cat# 2531, RRID:AB_330330
Rabbit Anti-Phospho-NEDD4-2 (S328) Antibody	kindly provided by O. Staub, University of Lausanne, Switzerland

## Sheet: Mice
Mouse line Nedd4Lflox	Baoli Yang (gift from O. Staub)	Nedd4ltm1.1Blyg	MGI Cat# 3846430, RRID:MGI:3846430
Mouse line SNS-Cre	Rohini Kuner	Tg(Scn10a-cre)1Rkun	MGI Cat# 3042874, RRID:MGI:3042874

## Sheet: Reagents
Acrylamide/Bis-acrylamide	SERVA Electrophoresis GmbH,Heidelberg, Germany	#10681
Aspartic acid	Sigma-Aldrich Inc., Saint-Louis, Missouri (MO), USA	#A9256
Bovine Serum Albumin (BSA)	Sigma-Aldrich Inc., Saint-Louis, Missouri (MO), USA	#A9647
Bromophenol blue	BioRad, Hercules, California (CA), USA	#161-0404
CaCl2 (Calcium chloride dihydrate)	Merck Millipore, Burlington, Massachusetts (MA), USA	#102382
Cd-Cl2 (Cadmium chloride hydrate)	Sigma-Aldrich Inc., Saint-Louis, Missouri (MO), USA	#529575
Choline-Cl	Sigma-Aldrich Inc., Saint-Louis, Missouri (MO), USA	#C1879
Complete protease inhibitor cocktail	Roche, Basel, Switzerland	#11697498001
CsCl (Cesium Chloride)	Sigma-Aldrich Inc., Saint-Louis, Missouri (MO), USA	#289329
CsF (Cesium fluoride)	Sigma-Aldrich Inc., Saint-Louis, Missouri (MO), USA	#289345
Cs-OH (Cesium hydroxide monohydrate)	Sigma-Aldrich Inc., Saint-Louis, Missouri (MO), USA	#516988
DMEM/F12	Thermo Fisher Scientific Inc., Waltham, Massachusetts (MA), USA	#21331-020
DTT (dithiothréitol)	AppliChem, Darmstadt, Germany	#A1101
Dulbecco's Modified Eagle's Medium (DMEM)	Thermo Fisher Scientific Inc., Waltham, Massachusetts (MA), USA	#21885-025
EDTA (Ethylene Diamine Tetra Acetic Acid)	Sigma-Aldrich Inc., Saint-Louis, Missouri (MO), USA	#E5134
EGTA (Ethylene Glycol Tetra Acetic Acid)	Sigma-Aldrich Inc., Saint-Louis, Missouri (MO), USA	#E4378
EZ-link Sulfo-NHS-SS-Biotin	Thermo Fisher Scientific Inc., Waltham, Massachusetts (MA), USA	#21331
Fetal Bovine Serum (FBS)	Thermo Fisher Scientific Inc., Waltham, Massachusetts (MA), USA	#10082
Glucose D-(+)	Sigma-Aldrich Inc., Saint-Louis, Missouri (MO), USA	#G7021
Glycerol (Calbiochem)	Merck Millipore, Burlington, Massachusetts (MA), USA	#356352
Glycine	AppliChem, Darmstadt, Germany	#A1067
HEPES	AppliChem, Darmstadt, Germany	#A1069
JetPEI	Polyplus transfection, New-York, New-York (NY), USA	#101-10N
KCl (Potassium Chloride)	Sigma-Aldrich Inc., Saint-Louis, Missouri (MO), USA	#P9333
Liberase blendzyme TH	Roche, Basel, Switzerland	#5401151001
Liberase blendzyme TM	Roche, Basel, Switzerland	#5401127001
Metformin-HCl	LKT Laboratories Inc.,St Paul, Minnesota (MN), USA	#LKT-M2076-G025
MgCl2-6H2O (Magnesium chloride hexahydrate)	Merck Millipore, Burlington, Massachusetts (MA), USA	#105832
Na2-ATP (Adenosine 5′-triphosphate disodium salt hydrate)	Sigma-Aldrich Inc., Saint-Louis, Missouri (MO), USA	#A2383
NaCl (Sodium Chloride)	Sigma-Aldrich Inc., Saint-Louis, Missouri (MO), USA	#S9625
NaCl 150 mM	Polyplus transfection, New-York, New-York (NY), USA	#702-50
NaOH (Sodium hydroxide)	Sigma-Aldrich Inc., Saint-Louis, Missouri (MO), USA	#S8045
NEM (N-Ethylmaleimide)	Sigma-Aldrich Inc., Saint-Louis, Missouri (MO), USA	#E3876
Papain	Sigma-Aldrich Inc., Saint-Louis, Missouri (MO), USA	#P3125
Penicillin/Streptomycin (P/S)	Sigma-Aldrich Inc., Saint-Louis, Missouri (MO), USA	#P0781
PhenylMethaneSulfonylFluoride (PMSF)	Sigma-Aldrich Inc., Saint-Louis, Missouri (MO), USA	#P7626
Phosphatase inhibitor cocktail (PhosSTOP EASYpack)	Roche, Basel, Switzerland	#04906837001
Phosphate buffered saline (PBS) pH7.4	Thermo Fisher Scientific Inc., Waltham, Massachusetts (MA), USA	#10010
Poly-D-Lysine	Sigma-Aldrich Inc., Saint-Louis, Missouri (MO), USA	#P7886
Protein Assay Dye reagent (Bradford test-based)	BioRad, Hercules, California (CA), USA	#500-0006
Protoxin II (ProTxII)	Kindly provided by B. Priest (Merck Serono)	#P0033
SDS (Sodium Dodecyl Sulfate)	Sigma-Aldrich Inc., Saint-Louis, Missouri (MO), USA	#L4390
Sorbitol	Sigma-Aldrich Inc., Saint-Louis, Missouri (MO), USA	#S1876
Strepatvidin Sepharose High Performance Beads	GE Healthcare, Chicago, Illinois (IL), USA?	#17-5113-01
Sucrose (D+ Saccharose)	AppliChem, Darmstadt, Germany	#A2211
SuperSignal West Dura Extended Duration Substrate	Thermo Fisher Scientific Inc., Waltham, Massachusetts (MA), USA	#34075
TEA-Cl (Tetraethylammonium chloride)	Sigma-Aldrich Inc., Saint-Louis, Missouri (MO), USA	#T2265
Tris	AppliChem, Darmstadt, Germany	#A1086
Triton X-100	Sigma-Aldrich Inc., Saint-Louis, Missouri (MO), USA	#T9284
Trypsin Inhibitor	Sigma-Aldrich Inc., Saint-Louis, Missouri (MO), USA	#T6522
