# Supplementary material for: The Antidiabetic Drug Metformin Regulates Voltage-Gated Sodium Channel NaV1.7 via the Ubiquitin-Ligase NEDD4-2
Source: eNeuro. 2022 Mar 3;9(2):ENEURO.0409-21.2022. doi: 10.1523/ENEURO.0409-21.2022 (PMC8906783; doi:10.1523/ENEURO.0409-21.2022)
Supplement: Table 1-2 — Supplemental data table of all statistical analysis, supporting all of the figures. Statistical table. Each row represents a dataset and the corresponding statistical tests, statistical values, p values, and Cohen’s effect size factor. Download Table 1-2, XLSX file. [file enu-eN-NWR-0409-21-s09.xlsx]

## Sheet: Feuil1
Extended Data Table: Statistical Analysis
Figure	Data Type	Statistical test Type	N	Stat-value	P-value (Two-tailed)	Cohen's effect-size
Figure 1
1B-1	Nav1.7 current density HEK (No [NEDD4-2])	Unpaired t-test with Welch's correction	Control = 47 Metformin = 20	t(51.07) = 0.8657	p = 0.3907	d = 0.214
1B-2	Nav1.7 current density HEK (High [NEDD4-2])	Unpaired t-test with Welch's correction	Control = 12 Metformin = 12	t(13.2) = 1.215	p = 0.2456	d = -0.496
1B-3	Nav1.7 current density HEK (Low [NEDD4-2])	Unpaired t-test with Welch's correction	Control = 21 Metformin = 21	t(26.57) = 3.221	p = 0.0034 **	d = 0.99
1B-4	Nav1.7 current density HEK (NEDD4-2CS)	Unpaired t-test with Welch's correction	Control = 13 Metformin = 13	t(24) = 0.3316	p = 0.7430	d = -0.13
1D-1	Western blot analysis of Nav1.7 expression (Low [NEDD4-2], S0 fraction)	Unpaired t-test with Welch's correction	Control = 10 Metformin = 10	t(17.47) =0.8871	p = 0.3871	d = -0.397
1D-2	Western blot analysis of Nav1.7 expression (Low [NEDD4-2], S2 fraction)	Unpaired t-test with Welch's correction	Control = 10 Metformin = 10	t(14.99) = 2.926	p = 0.0104 *	d = 1.309
Table 1
Table 1	Steady-state activation V1/2 (Nav1.7+empty plasmid)	Unpaired t-test with Welch's correction	Control = 30 Metformin = 17	t(30.3) = -1.46	p = 0.1544	d = -0.45
Table 1	Steady-state activation Slope(Nav1.7+empty plasmid)	Unpaired t-test with Welch's correction	Control = 30 Metformin = 17	t(34) = -1.66	p = 0.1062	d = -0.5
Table 1	Steady-state activation V1/2 (Nav1.7+Low [NEDD4-2])	Unpaired t-test with Welch's correction	Control = 16 Metformin = 11	t(21.1) = -0.77	p = 0.4506	d = -0.3
Table 1	Steady-state activation Slope (Nav1.7+Low [NEDD4-2])	Unpaired t-test with Welch's correction	Control = 16 Metformin = 11	t(24.3) = -3.08	p = 0.005	d = -1.18
Table 1	Steady-state activation V1/2 (Nav1.7+NEDD4-2CS)	Unpaired t-test with Welch's correction	Control = 12 Metformin = 11	t(18.1) = -0.27	p = 0.7907	d = -0.11
Table 1	Steady-state activation Slope (Nav1.7+NEDD4-2CS)	Unpaired t-test with Welch's correction	Control = 12 Metformin = 11	t(18.3) = -0.17	p = 0.8646	d = -0.07
Table 1	Steady-state inactivation V1/2 (Nav1.7+empty plasmid)	Unpaired t-test with Welch's correction	Control = 30 Metformin = 16	t(35.9) = 0.09	p = 0.9291	d = 0.03
Table 1	Steady-state inactivation Slope (Nav1.7+empty plasmid)	Unpaired t-test with Welch's correction	Control = 30 Metformin = 16	t(28.3) = -2.22	p = 0.0346	d = -0.7
Table 1	Steady-state inactivation V1/2 (Nav1.7+Low [NEDD4-2])	Unpaired t-test with Welch's correction	Control = 15 Metformin = 14	t(25.7) = 0.38	p = 0.7037	d = 0.14
Table 1	Steady-state inactivation Slope (Nav1.7+Low [NEDD4-2])	Unpaired t-test with Welch's correction	Control = 15 Metformin = 14	t(26.1) = 1.17	p = 0.2523	d = 0.43
Table 1	Steady-state inactivation V1/2 (Nav1.7+NEDD4-2CS)	Unpaired t-test with Welch's correction	Control = 12 Metformin = 12	t(21.9) = -0.4	p = 0.6905	d = -0.16
Table 1	Steady-state inactivation Slope (Nav1.7+NEDD4-2CS)	Unpaired t-test with Welch's correction	Control = 12 Metformin = 12	t(16.1) = 1.07	p = 0.2993	d = 0.44
Extended Data Figure 1-1
Extended data 1-1B-1	Western blot analysis of Nav1.7 expression in HEK (No [NEDD4-2], S0 fraction)	Unpaired t-test with Welch's correction	Control = 6 Metformin = 6	t(5.787) =1.279	p = 0.2498	d = -0.738
Extended data 1-1B-2	Western blot analysis of Nav1.7 expression in HEK (No [NEDD4-2], S2 fraction)	Unpaired t-test with Welch's correction	Control = 6 Metformin = 6	t(8.144) =2.104	p = 0.0679	d = -1.215
Extended data 1-1D-1	Western blot analysis of Nav1.7 expression in HEK (High [NEDD4-2], S0 fraction)	Unpaired t-test with Welch's correction	Control = 6 Metformin = 6	t(9.727) =0.5355	p = 0.6043	d = 0.309
Extended data 1-1D-2	Western blot analysis of Nav1.7 expression in HEK (High [NEDD4-2], S2 fraction)	Unpaired t-test with Welch's correction	Control = 6 Metformin = 6	t(9.524) = 0.5801	p = 0.5753	d = -0.335
Figure 2
2B-1	Total INa current density Nedd4Lfl/fl	Unpaired t-test with Welch's correction	Control = 28 Metformin = 22	t(47.72) = 2.554	p = 0.0139 *	d = 0.714
2B-2	Total INa current density SNS-Nedd4L-/-	Unpaired t-test with Welch's correction	Control = 27 Metformin = 23	t(48.92) = 0.9169	p = 0.3637	d = 0.256
2D-1	Nav1.7 current density Nedd4Lfl/fl	Unpaired t-test with Welch's correction	Control = 23 Metformin = 19	t(39.09) = 2.461	p = 0.0184 *	d = 0.761
2D-2	Nav1.7 current density SNS-Nedd4L-/-	Unpaired t-test with Welch's correction	Control = 20 Metformin = 20	t(37.18) = 0.7271	p = 0.4717	d = 0.23
Table 2
Table 2	Steady-state activation V1/2 (Nav total, Nedd4Lfl/fl)	Unpaired t-test with Welch's correction	Control = 15 Metformin = 10	t(16.8) = -0.37	p = 0.7147	d = -0.15
Table 2	Steady-state activation Slope (Nav total, Nedd4Lfl/fl)	Unpaired t-test with Welch's correction	Control = 15 Metformin = 10	t(20.3) = -0.096	p = 0.9243	d = -0.04
Table 2	Steady-state activation V1/2 (Nav1.7, Nedd4Lfl/fl)	Unpaired t-test with Welch's correction	Control = 6 Metformin = 5	t(7.4) = -0.47	p = 0.6507	d = -0.29
Table 2	Steady-state activation Slope (Nav1.7, Nedd4Lfl/fl)	Unpaired t-test with Welch's correction	Control = 6 Metformin = 5	t(8.67) = 0.547	p = 0.5982	d = 0.33
Table 2	Steady-state activation V1/2 (Nav total, SNS-Nedd4L-/-)	Unpaired t-test with Welch's correction	Control = 12 Metformin = 8	t(11.5) = 0.56	p = 0.5851	d = 0.27
Table 2	Steady-state activation Slope (Nav total, SNS-Nedd4L-/-)	Unpaired t-test with Welch's correction	Control = 12 Metformin = 8	t(17.9) = -3.73	p = 0.0015 **	d = -1.64
Table 2	Steady-state activation V1/2 (Nav1.7, SNS-Nedd4L-/-)	Unpaired t-test with Welch's correction	Control = 3 Metformin = 6	t(2.65) = 0.55	p = 0.6237	d = 0.42
Table 2	Steady-state activation Slope (Nav1.7, SNS-Nedd4L-/-)	Unpaired t-test with Welch's correction	Control = 3 Metformin = 6	t(2.79) = 0.83	p = 0.474	d = 0.63
Table 2	Steady-state inactivation V1/2 (Nav total, Nedd4Lfl/fl)	Unpaired t-test with Welch's correction	Control = 14 Metformin = 10	t(21.4) = -0.14	p = 0.8873	d = 0.06
Table 2	Steady-state inactivation Slope (Nav total, Nedd4Lfl/fl)	Unpaired t-test with Welch's correction	Control = 14 Metformin = 10	t(20.2) = -0.13	p = 0.8943	d = -0.06
Table 2	Steady-state inactivation V1/2 (Nav1.7, Nedd4Lfl/fl)	Unpaired t-test with Welch's correction	Control = 4 Metformin = 4	t(4.3) = 0.16	p = 0.883	d = 0.11
Table 2	Steady-state inactivation Slope (Nav1.7, Nedd4Lfl/fl)	Unpaired t-test with Welch's correction	Control = 4 Metformin = 4	t(3.54) = -0.83	p = 0.4589	d = -0.59
Table 2	Steady-state inactivation V1/2 (Nav total, SNS-Nedd4L-/-)	Unpaired t-test with Welch's correction	Control = 11 Metformin = 8	t(14.2) = 1.06	p = 0.3081	d = 0.5
Table 2	Steady-state inactivation Slope (Nav total, SNS-Nedd4L-/-)	Unpaired t-test with Welch's correction	Control = 11 Metformin = 8	t(10.4) = -2.9	p = 0.0153	d = -1.4
Table 2	Steady-state inactivation V1/2 (Nav1.7, SNS-Nedd4L-/-)	Unpaired t-test with Welch's correction	Control = 1 Metformin = 3	/	/	/
Table 2	Steady-state inactivation Slope (Nav1.7, SNS-Nedd4L-/-)	Unpaired t-test with Welch's correction	Control = 1 Metformin = 3	/	/	/
Figure 3
3B-1	Western blot analysis of Nav1.7 expression Nedd4Lfl/fl in DRG (S0)	Unpaired t-test with Welch's correction	Control = 8 Metformin = 8	t(11.79) = 4.205	p = 0.0013 **	d = 2.103
3B-2	Western blot analysis of Nav1.7 expression SNS-Nedd4L-/- in DRG (S0)	Unpaired t-test with Welch's correction	Control = 5 Metformin = 6	t(7.794) = 0.1407	p = 0.8917	d = 0.086
3D-1	Western blot analysis of Nav1.7 expression Nedd4Lfl/fl in DRG (S2)	Unpaired t-test with Welch's correction	Control = 8 Metformin = 8	t(13.99) = 5.957	p < 0.0001 ***	d = 2.979
3D-2	Western blot analysis of Nav1.7 expression SNS-Nedd4L-/- in DRG (S2)	Unpaired t-test with Welch's correction	Control = 6 Metformin = 6	t(9.066) = 1.002	p = 0.3423	d = 0.579
Extended Data Figure 3-1
Extended data 3-1B-1	Western blot analysis of AMPK (HEK)	Unpaired t-test with Welch's correction	Control = 6 Metformin = 6	t(9.716) = 1.418	p = 0.1874	d = -0.819
Extended data 3-1B-2	Western blot analysis of pAMPK (HEK)	Unpaired t-test with Welch's correction	Control = 6 Metformin = 6	t(5.005) = 1.66	p = 0.1578	d = -0.958
Extended data 3-1B-3	Western blot analysis of ratio (HEK)	Unpaired t-test with Welch's correction	Control = 6 Metformin = 6	t(5.238) = 2.071	p = 0.0906	d = -1.196
Extended data 3-1D-1	Western blot analysis of AMPK (DRG)	Unpaired t-test with Welch's correction	Control = 4 Metformin = 4	t(18.91) = 2.453	p = 0.0241 *	d = 1.067
Extended data 3-1D-2	Western blot analysis of pAMPK (DRG)	Unpaired t-test with Welch's correction	Control = 4 Metformin = 4	t(10.35) = 5.089	p = 0.0004 ***	d = -2.172
Extended data 3-1D-3	Western blot analysis of ratio (DRG)	Unpaired t-test with Welch's correction	Control = 4 Metformin = 4	t(10.06) = 3.574	p = 0.005 **	d = -1.524
Figure 4
4B-1	Western blot analysis of NEDD4-2 (DRG neurons)	Unpaired t-test with Welch's correction	Control = 4 Metformin = 4	t(5.916) = 1.803	p = 0.1221	d = 1.275
4B-2	Western blot analysis of pNEDD4-2 (DRG neurons)	Unpaired t-test with Welch's correction	Control = 4 Metformin = 4	t(4.005) = 4.391	p = 0.0117 *	d = 3.105
4B-3	Western blot analysis of ratio (DRG neurons)	Unpaired t-test with Welch's correction	Control = 4 Metformin = 4	t(5.847) = 5.328	p = 0.0019 **	d= 3.768
Figure 5
5A-1	Electrophysiological recordings current clamp (Nedd4Lfl/fl)	Mixed model ANOVA	Control = 14 Metformin = 16	Treatment: F(1, 28) = 27.3 Current: F(1.9, 55.8) = 37.49 Interaction: F(4, 112) = 7.474	Treatment: p = 0.0019 *** Current: p < 0.0001 *** Interaction: p < 0.0001 ***	Treatment: f = 0.3 Current: f = 0.35 Interaction: f = 0.07
5A-2	Electrophysiological recordings current clamp (SNS-Nedd4L-/-)	Mixed model ANOVA	Control = 11 Metformin = 16	Treatment: F(1, 25) = 4.6 Current: F(1.8, 44.5) = 43.16 Interaction: F(4, 100) = 10.77	Treatment: p = 0.0419 * Current: p < 0.0001 *** Interaction: p < 0.0001 ***	Treatment: f = 0.46 Current: f = 0.33 Interaction: f = 0.1
5B-1	AP Peak amplitude (Nedd4Lfl/fl)	Unpaired t-test with Welch's correction	Control = 14 Metformin = 14	t(24.04) = 3.278	p = 0.0032 **	d = 1.239
5B-2	AP Peak amplitude (SNS-Nedd4L-/-)	Unpaired t-test with Welch's correction	Control = 10 Metformin = 16	t(21.9) = 1.63	p = 0.1169	d = 0.64
5B-3	AP Baseline (Nedd4Lfl/fl)	Unpaired t-test with Welch's correction	Control = 14 Metformin = 14	t(25.93) = 3.127	p = 0.0043 **	d = -1.182
5B-4	AP Baseline (SNS-Nedd4L-/-)	Unpaired t-test with Welch's correction	Control = 10 Metformin = 16	t(17.5) = -1.85	p = 0.0814	d = -0.76
5B-5	AP Maximum Rise Time (Nedd4Lfl/fl)	Unpaired t-test with Welch's correction	Control = 14 Metformin = 14	t(22.5) = 2.693	p = 0.0131 *	d= 1.018
5B-6	AP Maximum Rise Time (SNS-Nedd4L-/-)	Unpaired t-test with Welch's correction	Control = 10 Metformin = 16	t(15.76) = 1.71	p = 0.1072	d = 0.71
5B-7	AP Rheobase (Nedd4Lfl/fl)	Unpaired t-test with Welch's correction	Control = 14 Metformin = 14	t(18.13) = -1.71	p = 0.1042	d = -0.65
5B-8	AP Rheobase (SNS-Nedd4L-/-)	Unpaired t-test with Welch's correction	Control = 10 Metformin = 16	t(21.56) = 2.513	p = 0.02 *	d = -0.994
5B-9	AP Resting Membrane Potential (Nedd4Lfl/fl)	Unpaired t-test with Welch's correction	Control = 14 Metformin = 14	t(26.18) = 0.82	p = 0.4191	d = 0.29
5B-10	AP Resting Membrane Potential (SNS-Nedd4L-/-)	Unpaired t-test with Welch's correction	Control = 10 Metformin = 16	t(19.18) = 2.282	p = 0.0341 *	d= 0.921
Extended Data Figure 5-1
Extended data Table 5-1	Amplitude (Nedd4Lfl/fl)	Unpaired t-test with Welch's correction	Control = 14 Metformin = 14	t(24.04) = 3.278	p = 0.0032 **	d = 1.239
Extended data Table 5-1	Time of Peak (Nedd4Lfl/fl)	Unpaired t-test with Welch's correction	Control = 14 Metformin = 14	t(15.2) = 1.97	p = 0.0678	d = 0.74
Extended data Table 5-1	Half-width (Nedd4Lfl/fl)	Unpaired t-test with Welch's correction	Control = 14 Metformin = 14	t(26) = -0.26	p = 0.7992	d = -0.1
Extended data Table 5-1	Maximum Rise Time (Nedd4Lfl/fl)	Unpaired t-test with Welch's correction	Control = 14 Metformin = 14	t(22.5) = 2.693	p = 0.0131 *	d= 1.018
Extended data Table 5-1	Maximum Decay (Nedd4Lfl/fl)	Unpaired t-test with Welch's correction	Control = 14 Metformin = 14	t(25.3) = -1.65	p = 0.1123	d = -0.62
Extended data Table 5-1	Baseline (Nedd4Lfl/fl)	Unpaired t-test with Welch's correction	Control = 14 Metformin = 14	t(25.93) = 3.127	p = 0.0043 **	d = -1.182
Extended data Table 5-1	Rheobase (Nedd4Lfl/fl)	Unpaired t-test with Welch's correction	Control = 14 Metformin = 14	t(18.13) = -1.71	p = 0.1042	d = -0.65
Extended data Table 5-1	Anti-peak (Nedd4Lfl/fl)	Unpaired t-test with Welch's correction	Control = 14 Metformin = 14	t(20.3) = -0.58	p = 0.5689	d = -0.22
Extended data Table 5-1	Time of anti-peak (Nedd4Lfl/fl)	Unpaired t-test with Welch's correction	Control = 14 Metformin = 14	t(17.5) = 0.74	p = 0.4689	d = 0.28
Extended data Table 5-1	RMP (Nedd4Lfl/fl)	Unpaired t-test with Welch's correction	Control = 14 Metformin = 14	t(26.18) = 0.82	p = 0.4191	d = 0.29
Extended data Table 5-1	Amplitude (SNS-Nedd4L-/-)	Unpaired t-test with Welch's correction	Control = 10 Metformin = 16	t(21.9) = 1.63	p = 0.1169	d = 0.64
Extended data Table 5-1	Time of Peak (SNS-Nedd4L-/-)	Unpaired t-test with Welch's correction	Control = 10 Metformin = 16	t(9.7) = 1.06	p = 0.3149	d = 0.47
Extended data Table 5-1	Half-width (SNS-Nedd4L-/-)	Unpaired t-test with Welch's correction	Control = 10 Metformin = 16	t(10.3) = 1.3	p = 0.2227	d = 0.57
Extended data Table 5-1	Maximum Rise Time (SNS-Nedd4L-/-)	Unpaired t-test with Welch's correction	Control = 10 Metformin = 16	t(15.76) = 1.71	p = 0.1072	d = 0.71
Extended data Table 5-1	Maximum Decay (SNS-Nedd4L-/-)	Unpaired t-test with Welch's correction	Control = 10 Metformin = 16	t(18) = 0.85	p = 0.4072	d = 0.35
Extended data Table 5-1	Baseline (SNS-Nedd4L-/-)	Unpaired t-test with Welch's correction	Control = 10 Metformin = 16	t(17.5) = -1.85	p = 0.0814	d = -0.76
Extended data Table 5-1	Rheobase (SNS-Nedd4L-/-)	Unpaired t-test with Welch's correction	Control = 10 Metformin = 16	t(21.56) = 2.513	p = 0.02 *	d = -0.994
Extended data Table 5-1	Anti-peak (SNS-Nedd4L-/-)	Unpaired t-test with Welch's correction	Control = 10 Metformin = 16	t(23.98) = 1.7	p = 0.1027	d = 0.65
Extended data Table 5-1	Time of anti-peak (SNS-Nedd4L-/-)	Unpaired t-test with Welch's correction	Control = 10 Metformin = 16	t(24) = -1.74	p = 0.095	d = -0.66
Extended data Table 5-1	RMP (SNS-Nedd4L-/-)	Unpaired t-test with Welch's correction	Control = 10 Metformin = 16	t(19.18) = 2.282	p = 0.0341 *	d= 0.921
